# Supplementary material for: Maternally Derived Microduplications at 15q11-q13: Implication of Imprinted Genes in Psychotic Illness
Source: Atypon-hosted journal article supplement (doi:10.1176/appi.ajp.2010.09111660), 2011-02-15
Supplement: ajp_168_04_408_01.pdf [file ajp_168_04_408_01.pdf]

*Supplementary material 1: Contributors to GROUP Investigators*

René S. Kahn<sup>1</sup>, Don Linszen<sup>2</sup>, Jim van Os<sup>3</sup>, Durk Wiersma<sup>4</sup>, Richard Bruggeman<sup>4</sup>, Wiepke Cahn<sup>1</sup>, Lieuwe de Haan<sup>2</sup>, Lydia Krabbendam<sup>3</sup>, and Inez Myin-Germeys<sup>3</sup>

<sup>1</sup>Department of Psychiatry, Rudolf Magnus Institute of Neuroscience, University Medical Centre Utrecht, Utrecht, The Netherlands

<sup>2</sup>Academic Medical Centre University of Amsterdam, Department of Psychiatry; Amsterdam, The Netherlands

<sup>3</sup>Maastricht University Medical Centre, EURON South Limburg Mental Health Research and Teaching Network, Maastricht, The Netherlands

<sup>4</sup>University Medical Centre Groningen, Department of Psychiatry, University of Groningen, The Netherlands
