# Supplementary material for: Maternally Derived Microduplications at 15q11-q13: Implication of Imprinted Genes in Psychotic Illness
Source: Atypon-hosted journal article supplement (doi:10.1176/appi.ajp.2010.09111660), 2011-02-15
Supplement: ajp_168_04_408_06.pdf [file ajp_168_04_408_06.pdf]

***Supplementary table 1: Sample breakdown by population and genotyping platform***

| <b>Site</b>                      | <b>Population</b> | <b>Affected</b> | <b>Controls</b> | <b>Genotyping platform</b>  |
|----------------------------------|-------------------|-----------------|-----------------|-----------------------------|
| <i>Discovery sample</i>          |                   |                 |                 |                             |
| Roskilde                         | Danish            | 22              | 0               | HumanCNV370                 |
| <i>SGENE+ follow-up samples</i>  |                   |                 |                 |                             |
| Roskilde                         | Danish            | 502             | 477             | Human610-Quad               |
| Bonn                             | German            | 491             | 881             | Human550v3                  |
| Helsinki                         | Finnish           | 63              | 150             | HumanHap300                 |
| Verona                           | Italian           | 86              | 91              | HumanHap300                 |
| Kuusamo                          | Finnish           | 128             | 50              | HumanHap300                 |
| London (Kings college)           | British           | 104             | 95              | HumanHap300                 |
| Munich                           | German            | 611             | 612             | HumanHap300                 |
| Nijmegen                         | Dutch             | 0               | 3,333           | HumanCNV370                 |
| Oslo                             | Norwegian         | 245             | 272             | Affy 6.0                    |
| Reykjavik <sup>1</sup>           | Icelandic         | 684             | 28,730          | HumanHap300/<br>HumanCNV370 |
| Utrecht                          | Dutch             | 806             | 706             | Human550v3                  |
| <i>ISC follow-up samples</i>     |                   |                 |                 |                             |
| Aberdeen                         | Scottish          | 727             | 694             | Affy 5.0 <sup>2</sup>       |
| Cardiff                          | Bulgarian         | 479             | 646             | Affy 6.0                    |
| Dublin                           | Irish             | 280             | 914             | Affy 6.0                    |
| Edinburgh                        | Scottish          | 403             | 290             | Affy 6.0                    |
| Karolinska Institutet            | Swedish           | 622             | 437             | Affy 5.0/6.0                |
| London (University college)      | British           | 547             | 0               | Affy 5.0                    |
| Portuguese Island Collection     | Portuguese        | 333             | 200             | Affy 5.0                    |
| <i>Cardiff follow-up samples</i> |                   |                 |                 |                             |
| Cardiff                          | British           | 471             | 2,792           | Affy 500K                   |
| <b>Total (follow-up)</b>         |                   | <b>7,582</b>    | <b>41,370</b>   |                             |

<sup>1</sup>A further 5,773 Icelandic samples were evaluated for 15q11.2-q13.1 duplications, but excluded from analysis of association with schizophrenia owing to a psychiatric or developmental diagnosis other than schizophrenia or schizoaffective disorder, or to a first degree relationship with a schizophrenia affected individual.

<sup>2</sup>A large part (661 affected and 670 controls) of the Aberdeen sample was also typed by the SGENE+ Consortium on HumanHap300 and Human550v3 arrays.
