# Supplementary figures and images for: Maternally Derived Microduplications at 15q11-q13: Implication of Imprinted Genes in Psychotic Illness
Source: Atypon-hosted journal article supplement (doi:10.1176/appi.ajp.2010.09111660), 2011-02-15

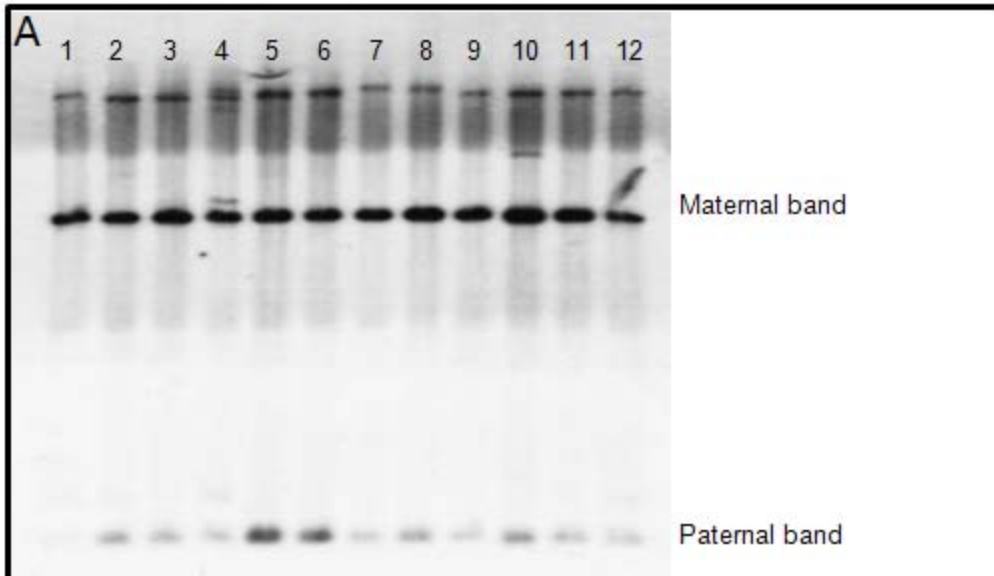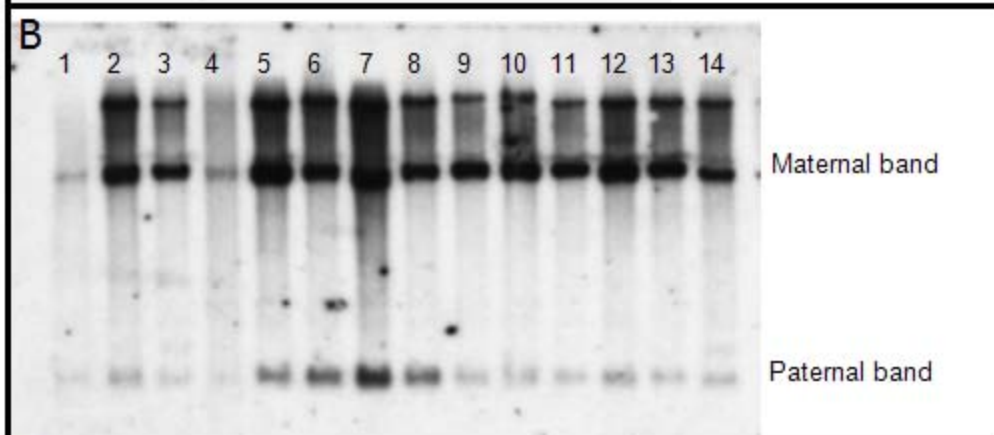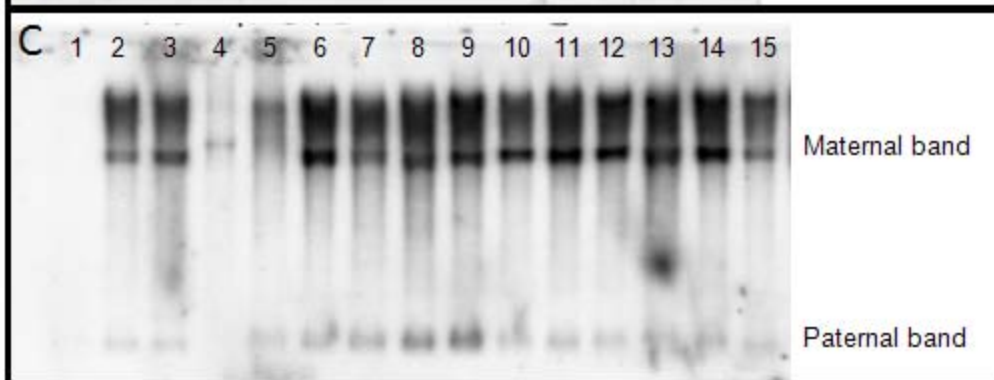

Supplement: ajp_168_04_408_05.pdf [file ajp_168_04_408_05.pdf]
